# Supplementary material for: Dynamic F-actin movement is essential for fertilization in Arabidopsis thaliana
Source: eLife journal article supplement (doi:10.7554/elife.04501), 2014-10-10
Supplement: supp [file elife_poa_e04501_Supplementary_File.xlsx]

## Sheet: Supplementary file 1A
Supplementary File 1. The list of primer sequences used for construct generation
Fragment	Gateway DONR Vector	Position	Sequence (5'-3')
pEC1	pDONR-P4P1r	Fw	AttB4-tgccttatgatttcttcggttt
		Rv	AttB1r-ttctcaacagattgataaggtcgaa
pFWA	pDONR-P4P1r	Fw	AttB4-tttagctgaaggaaatgaaaacc
		Rv	AttB1r-ctcgtatgaatgttgaatgggata
pH3.10::H3.10	pDONR-P4P1r	Fw	AttB4-tacttctccgaccaaaaactttca
		Rv	AttB1r-agcacgttccccacgaat
pROP8	pDONR-P4P1r	Fw	AttB4-caagactgtccgcaacagaa
		Rv	AttB1r-tgattgagaaaattctctgattttacttacc
pOPx4	pDONR-P4P1r	Fw	AttB4-ctgcggccggtacctaga
		Rv	AttB1r-gtcctctccaaatgaaatgaactt
Lifeact-Venus	pDONR221	Fw-1	AttB1-atgggtgtcgcagatttgatcaagaaattcgaaagcatctc
		Fw-2	gatcaagaaattcgaaagcatctcaaaggaagaaggcggcagcggcatggtgagcaagggcgag
		Rv	AttB2-ttacttgtacagctcgtcca
omega (Ω)	pDONR221	Fw	AttB1-gtatttttacaacaattaccaacaacaacaaacaacaaacaacattacaattactatttacaattaca
		Rv	AttB2-tatatctccttggatcgatcccctgtaattgtaattgtaaatagtaattgtaatg
DN-ACTIN	pDONR221	Fw-1	AttB1-atggccgatgctgatgac
		Rv-1	cagctttcattccaacaaatgat
		Fw-2	gatggagacctcgaaaacca
		Rv-2	AttB2-ttagaagcattttctgtggacaa
mCherry	pDONR221	Fw	AttB1-atggtgagcaagggcgag
		Rv	AttB2-ttacttgtacagctcgtcca
Clover	pDONR221	Fw	AttB1-atggtgagcaagggcgag
		Rv	AttB2-ttacttgtacagctcgtcca
Ω:Venus	pDONR221	Fw-1	AttB1-gtatttttacaacaattaccaacaacaacaaacaacaaacaacattacaattactatttacaattaca
		Fw-2	acaaacaacattacaattactatttacaattacaattacaggggatcgatccaaggagatataacaatggtgagcaagggcgagga
		Rv	AttB2-cttgtacagctcgtccatg
Ω:H2B	pDONR221	Fw	AttB1-gtatttttacaacaattaccaacaacaacaaacaacaaacaacattacaattactatttacaattaca
		Rv	AttB2-cggatccccagctccagc
LhGR	pDONR221	Fw	AttB1-atggctagtgaagctcgaaaaa
		Rv	AttB2-ttactctttttttgggtttggtg
NLS-mCherry	pDONR221	Fw-1	AttB1-atgcagccttctcttaaacgtatgaaaattgagcca
		Fw-2	cttaaacgtatgaaaattgagccatcttctcaacctatggtgagcaagggcgag
		Rv	AttB2-cttgtacagctcgtccatg
Venus-MAP4	pDONR221	Fw-1	AttB1-atggtgagcaagggcgag
		Rv-1	acatggcggccgctctagacttgtacagctcgtccatg
		Fw-2	catggacgagctgtacaagtctagagcggccgccatgt
		Rv-2	AttB2-tcagatcccgggcccacct
ROP8	pDONR-P2rP3	Fw	AttB2r-atgtcagcttcaatggctgca
		Rv	AttB3-tcaaagaacatggcataaacc
CA-ROP8	pDONR-P2rP3	Fw-1	AttB2r-atgtcagcttcaatggctgca
		Rv-1	ctattgtagtcttcaagaccagcagtatcccagagacc
		Fw-2	actgctggtcttgaagactacaatagggttagaccattg
		Rv-2	AttB3-tcaaagaacatggcataaacc
DN-ROP8	pDONR-P2rP3	Fw-1	AttB2r-atgtcagcttcaatggctgca
		Rv-1	gttgtctcttagagctgatttggttcccacaagaac
		Fw-2	gaaccaaatcagctctaagagacaacatgcagttccc
		Rv-2	AttB3-tcaaagaacatggcataaacc
P2A:DN-ACTIN	pDONR-P2rP3	Fw-1	AttB2r-ggttctggagctactaacttctctctcttgaagcaagcaggagatg
		Fw-2	ctctcttgaagcaagcaggagatgtggaagaaaaccctggtccaatggccgatgctgatgac
		Rv	AttB3-ttagaagcattttctgtggacaa
Venus	pDONR-P2rP3	Fw	AttB2r-atggtgagcaagggcgag
		Rv	AttB3-ttacttgtacagctcgtcca
Olignucleotides		AttB4	ggggacaactttgtatagaaaagttg
		AttB1r	ggggactgcttttttgtacaaacttgg
		AttB1	ggggacaagtttgtacaaaaaagcaggctcc
		AttB2	ggggaccactttgtacaagaaagctgggtc
		AttB2r	ggggacagctttcttgtacaaagtgggt
		AttB3	ggggacaactttgtataataaagttgg
				99
				74

## Sheet: Supplementary file 1B
Supplementary File 2. The list of Gateway vector constructs generated in this work
Construct	Gateway destination vector	Gateway 1st cassette ENTR vector	Gateway 2nd cassette ENTR vector	Gateway 3rd cassette ENTR vector
pEC1::Lifeact-Venus	pB7m24GW,3	pENTR-R4/pEC1/R1r	pENTR-R1/Lifeact-Venus/R2	-
pEC1::DN-ACTIN	pAlligatorG43	pENTR-R4/pEC1/R1r	pENTR-R1/DN-ACTIN/R2	EMPTY cassette
pFWA::Lifeact-Venus	pK7m24GW,3	pENTR-R4/pFWA/R1r	pENTR-R1/Lifeact-Venus/R2	-
pFWA::DN-ACTIN	pH7m24GW,3	pENTR-R4/pFWA/R1r	pENTR-R1/DN-ACTIN/R2	-
pFWA::LhGR	pB7m24GW,3	pENTR-R4/pFWA/R1r	pENTR-R1/LhGR/R2	-
pOPx4::NLS-mCherry-P2A-DN-ACTIN	pAlligatorG43	pENTR-R4/pOPx4/R1r	pENTR-R1/NLS-mCherry/R2	pENTR-R2r/P2A-DN-ACTIN/R3
pH3.10::H3.10-Clover	pB7m24GW,3	pENTR-R4/pH3.10::H3.10/R1r	pENTR-R1/Clover/R2	-
pROP8::Ω:CA-ROP8	pAlligatorR43	pENTR-R4/pROP8/R1r	pENTR-R1/Ω/R2	pENTR-R2r/CA-ROP8/R3
pROP8::Ω:DN-ROP8	pAlligatorR43	pENTR-R4/pROP8/R1r	pENTR-R1/Ω/R2	pENTR-R2r/DN-ROP8/R3
pROP8::Ω:H2B-Venus	pAlligatorR43	pENTR-R4/pROP8/R1r	pENTR-R1/Ω:H2B/R2	pENTR-R2r/Venus/R3
pROP8::Ω:Venus-ROP8	pAlligatorR43	pENTR-R4/pROP8/R1r	pENTR-R1/Ω:Venus/R2	pENTR-R2r/ROP8/R3
pFWA::Venus-MAP4	pB7m24GW,3	pENTR-R4/pFWA/R1r	pENTR-R1/Venus-MAP4/R2	-
